# Supplementary material for: Genome-wide identification and expression analysis of the WRKY genes in sugar beet (Beta vulgaris L.) under alkaline stress
Source: PeerJ. 2019 Oct 14;7:e7817. doi: 10.7717/peerj.7817 (PMC6796966; doi:10.7717/peerj.7817)
Supplement: Data S1 [file peerj-07-7817-s001.xlsx]

## Sheet: Na+ and K+ concentration
Na+ and K+ concentration in shoot of sugar beet seedling exposed to various concentrations of NaHCO3.
NaHCO3 (mM)	ODNa+	CNa+	DW (g)	Na+ concentration (mmol/g DW)	Mean	SD	SE	ODK+	CK+	DW (g)	K+ concentration (mmol/g DW)	Mean	SD	SE
0	2.7	0.108697	0.0413	1.05276	1.27847	0.214106	0.0756979	7.5	0.188866	0.0413	1.82921	1.92131	0.170158	0.06016
	2.5	0.0999695	0.0292	1.36944				5.5	0.137555	0.0292	1.88431
	2.1	0.0825136	0.0247	1.33625				4.7	0.11703	0.0247	1.89522
	2	0.0781497	0.0198	1.57878				3.7	0.0913746	0.0198	1.84595
	2.4	0.0956055	0.0299	1.279				6.6	0.165776	0.0299	2.21773
	2.1	0.0825136	0.0218	1.51401				4.7	0.11703	0.0218	2.14734
	2.3	0.0912415	0.0369	0.989068				6.7	0.168341	0.0369	1.82484
	2.8	0.113061	0.0408	1.10844				7	0.176038	0.0408	1.72586
15	3.8	0.156701	0.027	2.32149	2.23244	0.114339	0.0404249	3.9	0.0965057	0.027	1.42971	1.41114	0.0914239	0.0323232
	3.8	0.156701	0.0265	2.3653				3.5	0.0862435	0.0265	1.30179
	4	0.165429	0.0304	2.17669				4.7	0.11703	0.0304	1.53987
	6.3	0.2658	0.0497	2.13923				6.5	0.16321	0.0497	1.31356
	6.7	0.283256	0.0525	2.15814				7.1	0.178603	0.0525	1.36079
	3.7	0.152337	0.0285	2.13806				4	0.0990713	0.0285	1.39047
	5.5	0.230888	0.043	2.1478				6.6	0.165776	0.043	1.5421
	5.6	0.235252	0.039	2.41284				5.5	0.137555	0.039	1.41082
25	5	0.209068	0.0347	2.41001	2.52591	0.274581	0.0970789	5.7	0.142686	0.0347	1.64479	1.64437	0.161014	0.0569271
	5.1	0.213432	0.0358	2.38472				6.9	0.173472	0.0358	1.93824
	7.2	0.305075	0.0424	2.87807				6.7	0.168341	0.0424	1.58812
	4.1	0.169793	0.0337	2.01534				4.6	0.114465	0.0337	1.35863
	4.5	0.187249	0.0276	2.71375				4.6	0.114465	0.0276	1.65891
	6.6	0.278892	0.0456	2.44642				7.8	0.196562	0.0456	1.72423
	5.5	0.230888	0.0332	2.78178				5.5	0.137555	0.0332	1.65728
	6.1	0.257072	0.0399	2.57716				6.3	0.158079	0.0399	1.58475
50	5.7	0.239616	0.0338	2.83569	2.80451	0.417438	0.147586	4.2	0.104202	0.0338	1.23316	1.47505	0.216855	0.0766697
	4.2	0.174157	0.0218	3.19554				3.2	0.0785469	0.0218	1.44123
	7.5	0.318167	0.0445	2.85993				5.9	0.147817	0.0445	1.32869
	6	0.252708	0.0345	2.92995				4.4	0.109333	0.0345	1.26763
	5.8	0.24398	0.0353	2.76465				5	0.124727	0.0353	1.41333
	7	0.296347	0.047	2.52211				7.2	0.181169	0.047	1.54186
	4.3	0.178521	0.036	1.98356				6.3	0.158079	0.036	1.75643
	5.9	0.248344	0.0297	3.3447				5.4	0.134989	0.0297	1.81803
100	3.3	0.134881	0.0237	2.27647	2.58323	0.575322	0.203407	2.8	0.0682847	0.0237	1.15248	1.55271	0.288509	0.102003
	4.4	0.182885	0.0431	1.6973				4.6	0.114465	0.0431	1.06232
	4.4	0.182885	0.0341	2.14527				5.8	0.145251	0.0341	1.70383
	6.1	0.257072	0.0393	2.61651				6.8	0.170907	0.0393	1.73951
	4.3	0.178521	0.0262	2.72551				4.5	0.111899	0.0262	1.70838
	4.1	0.169793	0.0262	2.59226				4.3	0.106768	0.0262	1.63004
	3.7	0.152337	0.0169	3.60561				3.2	0.0785469	0.0169	1.8591
	6.6	0.278892	0.0371	3.00692				5.8	0.145251	0.0371	1.56605
Na+ and K+ concentration in roots of sugar beet seedling exposed to various concentrations of NaHCO3.
NaHCO3 (mM)	ODNa+	CNa+	DW (g)	Na+ concentration (mmol/g DW)	Mean	SD	SE	ODK+	CK+	DW (g)	K+ concentration (mmol/g DW)	Mean	SD	SE
0	1.4	0.051966	0.0126	0.412428	0.784226	0.268115	0.0947929	8.3	0.20939	0.0126	1.66182	2.0424	0.424316	0.150018
	1.5	0.0563299	0.0079	0.713037				6.5	0.16321	0.0079	2.06595
	1.7	0.0650578	0.0063	1.03266				7.5	0.188866	0.0063	2.99787
	1.8	0.0694218	0.0056	1.23967				3.8	0.0939402	0.0056	1.6775
	1.9	0.0737857	0.0085	0.868067				7	0.176038	0.0085	2.07103
	1.5	0.0563299	0.0067	0.840745				5.1	0.127292	0.0067	1.89989
	1.7	0.0650578	0.0111	0.586107				8.1	0.204259	0.0111	1.84017
	2.1	0.0825136	0.0142	0.581082				11.9	0.30175	0.0142	2.125
15	3.2	0.130517	0.0091	1.43425	1.82787	0.306549	0.108381	5.2	0.129858	0.0091	1.42701	1.52668	0.300596	0.106277
	3.4	0.139245	0.0085	1.63818				4.2	0.104202	0.0085	1.22591
	3.4	0.139245	0.0083	1.67765				5.9	0.147817	0.0083	1.78092
	6.7	0.283256	0.0146	1.94011				7.8	0.196562	0.0146	1.34632
	6.3	0.2658	0.0152	1.74868				7.1	0.178603	0.0152	1.17502
	3.9	0.161065	0.0098	1.64352				7.9	0.199128	0.0098	2.03192
	6.7	0.283256	0.0125	2.26604				7.3	0.183734	0.0125	1.46988
	4.9	0.204704	0.009	2.27449				6.3	0.158079	0.009	1.75643
25	5.5	0.230888	0.0105	2.19893	1.81844	0.279241	0.0987265	8.3	0.20939	0.0105	1.99419	1.60836	0.285982	0.10111
	4.5	0.187249	0.0114	1.64253				5.4	0.134989	0.0114	1.18411
	5.3	0.22216	0.0118	1.88271				8.1	0.204259	0.0118	1.73101
	5.1	0.213432	0.0114	1.87221				5.9	0.147817	0.0114	1.29664
	3.5	0.143609	0.0104	1.38086				7	0.176038	0.0104	1.69267
	5.3	0.22216	0.0125	1.77728				9.3	0.235045	0.0125	1.88036
	4.5	0.187249	0.0086	2.17731				5.8	0.145251	0.0086	1.68897
	4.8	0.20034	0.0124	1.61565				6.9	0.173472	0.0124	1.39897
50	5.4	0.226524	0.0101	2.24281	2.01402	0.753125	0.26627	4	0.0990713	0.0101	0.980904	1.21018	0.490411	0.173387
	4.2	0.174157	0.0071	2.45291				4.1	0.101637	0.0071	1.4315
	5.9	0.248344	0.0113	2.19773				5.5	0.137555	0.0113	1.2173
	5.4	0.226524	0.0095	2.38446				4.8	0.119596	0.0095	1.2589
	4.8	0.20034	0.0078	2.56847				5.2	0.129858	0.0078	1.66484
	6.8	0.287619	0.0128	2.24703				8.1	0.204259	0.0128	1.59577
	4.4	0.182885	0.0103	1.77558				5.8	0.145251	0.0103	1.41021
	4.5	0.187249	0.077	0.24318				3.8	0.0939402	0.077	0.122
100	4	0.165429	0.0071	2.32998	2.44127	0.506183	0.178963	3.2	0.0785469	0.0071	1.10629	1.65351	0.465501	0.164579
	5.1	0.213432	0.0093	2.29497				6.4	0.160644	0.0093	1.72736
	3.8	0.156701	0.0083	1.88796				5.5	0.137555	0.0083	1.65728
	5.9	0.248344	0.0118	2.10461				7	0.176038	0.0118	1.49185
	4.5	0.187249	0.008	2.34061				5	0.124727	0.008	1.55908
	3.9	0.161065	0.0066	2.44038				5.3	0.132423	0.0066	2.00642
	3.5	0.143609	0.004	3.59022				4.1	0.101637	0.004	2.54092
	5.8	0.24398	0.0096	2.54146				4.4	0.109333	0.0096	1.13889

## Sheet: Figure
(a) Na+ concentration (mmol/g DW)
NaCHO3 (mM)	Shoot	Root	Shoot SE	Root SE
0	1.27847	0.784226	0.0756979	0.0947929
15	2.23244	1.82787	0.0404249	0.108381
25	2.52591	1.81844	0.0970789	0.0987265
50	2.80451	2.01402	0.147586	0.26627
100	2.58323	2.44127	0.203407	0.178963
(b) K+ concentration (mmol/g DW)
NaCHO3 (mM)	Shoot	Root	Shoot SE	Root SE
0	1.92131	2.0424	0.06016	0.150018
15	1.41114	1.52668	0.0323232	0.106277
25	1.64437	1.60836	0.0569271	0.10111
50	1.47505	1.21018	0.0766697	0.173387
100	1.55271	1.65351	0.102003	0.164579
