# Supplementary material for: Genome-wide identification and expression analysis of the WRKY genes in sugar beet (Beta vulgaris L.) under alkaline stress
Source: PeerJ. 2019 Oct 14;7:e7817. doi: 10.7717/peerj.7817 (PMC6796966; doi:10.7717/peerj.7817)
Supplement: Table S4 [file peerj-07-7817-s009.xlsx]

## Sheet: BvWRKY3
S_Name	Gene	Ct	Mean Ct	ΔCт	ΔCт Mean	ΔΔCт	2^-	Mean	SD	SE
S-0	actin	16.06	16.2033	-0.143333	0	-0.143333	1.10445	1.00773	0.148278	0.0856084
S-0	actin	16.09		-0.113333		-0.113333	1.08172
S-0	actin	16.46		0.256667		0.256667	0.83702
S-0	BvWRKY3	28.32	27.8033	12.1167	11.6	0.516667	0.698985	1.03293	0.304545	0.175829
S-0	BvWRKY3	27.43		11.2267		-0.373333	1.29534
S-0	BvWRKY3	27.66		11.4567		-0.143333	1.10445
S-15	actin	16.14	16.38	-0.24	1.18424e-15	-0.24	1.18099	1.00961	0.170064	0.0981863
S-15	actin	16.37		-0.01		-0.01	1.00696
S-15	actin	16.63		0.25		0.25	0.840896
S-15	BvWRKY3	26.75	27.0067	10.37	10.6267	-1.23	2.34567	1.98465	0.35509	0.205011
S-15	BvWRKY3	27		10.62		-0.98	1.97247
S-15	BvWRKY3	27.27		10.89		-0.71	1.6358
S-25	actin	15.64	15.7	-0.06	-5.92119e-16	-0.06	1.04247	1.00446	0.113713	0.0656522
S-25	actin	15.57		-0.13		-0.13	1.09429
S-25	actin	15.89		0.19		0.19	0.876606
S-25	BvWRKY3	26.55	26.3633	10.85	10.6633	-0.75	1.68179	1.92276	0.220366	0.127228
S-25	BvWRKY3	26.32		10.62		-0.98	1.97247
S-25	BvWRKY3	26.22		10.52		-1.08	2.11404
S-50	actin	17.26	17.5233	-0.263333	0	-0.263333	1.20025	1.0086	0.165999	0.0958397
S-50	actin	17.66		0.136667		0.136667	0.909618
S-50	actin	17.65		0.126667		0.126667	0.915945
S-50	BvWRKY3	28.05	28.2867	10.5267	10.7633	-1.07333	2.10429	1.82799	0.453712	0.261951
S-50	BvWRKY3	28.74		11.2167		-0.383333	1.30435
S-50	BvWRKY3	28.07		10.5467		-1.05333	2.07532
S-100	actin	16.78	16.2433	0.536667	-1.77636e-15	0.536667	0.689362	1.03297	0.299002	0.172629
S-100	actin	16.01		-0.233333		-0.233333	1.17555
S-100	actin	15.94		-0.303333		-0.303333	1.23399
S-100	BvWRKY3	28.1	28.18	11.8567	11.9367	0.256667	0.83702	0.792533	0.0399792	0.023082
S-100	BvWRKY3	28.24		11.9967		0.396667	0.759611
S-100	BvWRKY3	28.2		11.9567		0.356667	0.780967
R-0	actin	14.17	14.7833	-0.613333	0	-0.613333	1.52979	1.05912	0.437129	0.252377
R-0	actin	15.37		0.586667		0.586667	0.66588
R-0	actin	14.81		0.0266667		0.0266667	0.981686
R-0	BvWRKY3	24.65	24.5533	9.86667	9.77	0.0966667	0.935191	1.00951	0.174249	0.100603
R-0	BvWRKY3	24.28		9.49667		-0.273333	1.2086
R-0	BvWRKY3	24.73		9.94667		0.176667	0.884745
R-15	actin	14.8	14.7	0.1	-1.18424e-15	0.1	0.933033	1.00444	0.118105	0.0681877
R-15	actin	14.79		0.09		0.09	0.939523
R-15	actin	14.51		-0.19		-0.19	1.14076
R-15	BvWRKY3	24.47	24.5233	9.77	9.82333	0	1	0.965554	0.0720899	0.0416211
R-15	BvWRKY3	24.45		9.75		-0.02	1.01396
R-15	BvWRKY3	24.65		9.95		0.18	0.882703
R-25	actin	13.68	13.74	-0.06	-5.92119e-16	-0.06	1.04247	1.00446	0.113713	0.0656522
R-25	actin	13.61		-0.13		-0.13	1.09429
R-25	actin	13.93		0.19		0.19	0.876606
R-25	BvWRKY3	23.45	23.49	9.71	9.75	-0.06	1.04247	1.01473	0.0480365	0.0277339
R-25	BvWRKY3	23.45		9.71		-0.06	1.04247
R-25	BvWRKY3	23.57		9.83		0.06	0.959264
R-50	actin	14.06	14.18	-0.12	0	-0.12	1.08673	1.002	0.0780546	0.0450649
R-50	actin	14.2		0.02		0.02	0.986233
R-50	actin	14.28		0.1		0.1	0.933033
R-50	BvWRKY3	24.06	24.1	9.88	9.92	0.11	0.926588	0.901439	0.0226346	0.0130681
R-50	BvWRKY3	24.11		9.93		0.16	0.895025
R-50	BvWRKY3	24.13		9.95		0.18	0.882703
R-100	actin	14.75	14.8933	-0.143333	5.92119e-16	-0.143333	1.10445	1.01582	0.210428	0.121491
R-100	actin	14.67		-0.223333		-0.223333	1.16743
R-100	actin	15.26		0.366667		0.366667	0.775572
R-100	BvWRKY3	23.9	23.8433	9.00667	8.95	-0.763333	1.69741	1.77944	0.278517	0.160802
R-100	BvWRKY3	24.03		9.13667		-0.633333	1.55114
R-100	BvWRKY3	23.6		8.70667		-1.06333	2.08975
S: Shoot; R: Root

## Sheet: BvWRKY10
S_Name	Gene	Ct	Mean Ct	ΔCт	ΔCт Mean	ΔΔCт	2^-	Mean	SD	SE
S-0	actin	16.08	16.1133	-0.0333333	-1.18424e-15	-0.0333333	1.02337	1.0002	0.0243037	0.0140317
S-0	actin	16.11		-0.00333333		-0.00333333	1.00231
S-0	actin	16.15		0.0366667		0.0366667	0.974905
S-0	BvWRKY10	24.08	24.75	7.96667	8.63667	-0.67	1.59107	1.06003	0.462857	0.267231
S-0	BvWRKY10	24.99		8.87667		0.24	0.846745
S-0	BvWRKY10	25.18		9.06667		0.43	0.742262
S-15	actin	15.79	15.9833	-0.193333	-1.18424e-15	-0.193333	1.1434	1.00497	0.124192	0.0717024
S-15	actin	16.03		0.0466667		0.0466667	0.968171
S-15	actin	16.13		0.146667		0.146667	0.903335
S-15	BvWRKY10	24.05	23.8633	8.06667	7.88	-0.57	1.48452	1.73003	0.478564	0.276299
S-15	BvWRKY10	24.11		8.12667		-0.51	1.42405
S-15	BvWRKY10	23.43		7.44667		-1.19	2.28153
S-25	actin	16.42	16.3133	0.106667	1.18424e-15	0.106667	0.928731	1.00241	0.0859425	0.0496189
S-25	actin	16.18		-0.133333		-0.133333	1.09682
S-25	actin	16.34		0.0266667		0.0266667	0.981686
S-25	BvWRKY10	23.91	23.7733	7.59667	7.46	-1.04	2.05623	2.29868	0.531288	0.306739
S-25	BvWRKY10	24		7.68667		-0.95	1.93187
S-25	BvWRKY10	23.41		7.09667		-1.54	2.90795
S-50	actin	17.18	17.2233	-0.0433333	1.18424e-15	-0.0433333	1.03049	1.00753	0.148685	0.0858432
S-50	actin	17.03		-0.193333		-0.193333	1.1434
S-50	actin	17.46		0.236667		0.236667	0.848704
S-50	BvWRKY10	24.09	24.1633	6.86667	6.94	-1.77	3.41054	3.24443	0.168441	0.0972496
S-50	BvWRKY10	24.24		7.01667		-1.62	3.07375
S-50	BvWRKY10	24.16		6.93667		-1.7	3.24901
S-100	actin	16.11	16.2733	-0.163333	3.55271e-15	-0.163333	1.11987	1.00903	0.160086	0.0924257
S-100	actin	16.16		-0.113333		-0.113333	1.08172
S-100	actin	16.55		0.276667		0.276667	0.825496
S-100	BvWRKY10	23.4	23.36	7.12667	7.08667	-1.51	2.8481	2.92949	0.108382	0.0625746
S-100	BvWRKY10	23.3		7.02667		-1.61	3.05252
S-100	BvWRKY10	23.38		7.10667		-1.53	2.88786
R-0	actin	14.09	14.1267	-0.0366667	0	-0.0366667	1.02574	1.00159	0.0683436	0.0394582
R-0	actin	14.05		-0.0766667		-0.0766667	1.05458
R-0	actin	14.24		0.113333		0.113333	0.92445
R-0	BvWRKY10	22.09	21.98	7.96333	7.85333	0.11	0.926588	1.00147	0.0657455	0.0379582
R-0	BvWRKY10	21.94		7.81333		-0.04	1.02811
R-0	BvWRKY10	21.91		7.78333		-0.07	1.04972
R-15	actin	14.51	14.7533	-0.243333	1.18424e-15	-0.243333	1.18372	1.00742	0.153515	0.0886321
R-15	actin	14.9		0.146667		0.146667	0.903335
R-15	actin	14.85		0.0966667		0.0966667	0.935191
R-15	BvWRKY10	22.05	22.0133	7.29667	7.26	-0.556667	1.47087	1.50912	0.0424135	0.0244874
R-15	BvWRKY10	21.97		7.21667		-0.636667	1.55473
R-15	BvWRKY10	22.02		7.26667		-0.586667	1.50177
R-25	actin	14.95	14.5167	0.433333	5.92119e-16	0.433333	0.740549	1.16673	0.830525	0.479504
R-25	actin	15.17		0.653333		0.653333	0.63581
R-25	actin	13.43		-1.08667		-1.08667	2.12383
R-25	BvWRKY10	21.87	21.97	7.35333	7.45333	-0.5	1.41421	1.32277	0.11226	0.0648133
R-25	BvWRKY10	21.93		7.41333		-0.44	1.3566
R-25	BvWRKY10	22.11		7.59333		-0.26	1.19748
R-50	actin	14.24	14.1733	0.0666667	0	0.0666667	0.954842	1.03106	0.316515	0.18274
R-50	actin	14.57		0.396667		0.396667	0.759611
R-50	actin	13.71		-0.463333		-0.463333	1.37872
R-50	BvWRKY10	22.52	22.5567	8.34667	8.38333	0.493333	0.710382	0.692889	0.0261646	0.0151061
R-50	BvWRKY10	22.53		8.35667		0.503333	0.705475
R-50	BvWRKY10	22.62		8.44667		0.593333	0.66281
R-100	actin	13.92	14.0533	-0.133333	-1.18424e-15	-0.133333	1.09682	1.00218	0.0822277	0.0474742
R-100	actin	14.11		0.0566667		0.0566667	0.961483
R-100	actin	14.13		0.0766667		0.0766667	0.948246
R-100	BvWRKY10	22.32	22.3633	8.26667	8.31	0.413333	0.750886	0.728905	0.0227404	0.0131292
R-100	BvWRKY10	22.41		8.35667		0.503333	0.705475
R-100	BvWRKY10	22.36		8.30667		0.453333	0.730353
S: Shoot; R: Root

## Sheet: BvWRKY16
S_Name	Gene	Ct	Mean Ct	ΔCт	ΔCт Mean	ΔΔCт	2^-	Mean	SD	SE
S-0	actin	16.56	16.63	-0.07	0	-0.07	1.04972	1.00924	0.163491	0.0943914
S-0	actin	16.43		-0.2		-0.2	1.1487
S-0	actin	16.9		0.27		0.27	0.82932
S-0	BvWRKY16	27.42	27.8667	10.79	11.2367	-0.446667	1.36289	1.0298	0.307718	0.177661
S-0	BvWRKY16	27.91		11.28		0.0433333	0.97041
S-0	BvWRKY16	28.27		11.64		0.403333	0.756109
S-15	actin	17.06	16.84	0.22	-1.18424e-15	0.22	0.858565	1.0074	0.149062	0.0860609
S-15	actin	16.63		-0.21		-0.21	1.15669
S-15	actin	16.83		-0.01		-0.01	1.00696
S-15	BvWRKY16	27.65	28.01	10.81	11.17	-0.426667	1.34412	1.06969	0.267194	0.154265
S-15	BvWRKY16	28.38		11.54		0.303333	0.810378
S-15	BvWRKY16	28		11.16		-0.0766667	1.05458
S-25	actin	15.78	15.8167	-0.0366667	1.77636e-15	-0.0366667	1.02574	1.00191	0.0748282	0.0432021
S-25	actin	15.73		-0.0866667		-0.0866667	1.06191
S-25	actin	15.94		0.123333		0.123333	0.918064
S-25	BvWRKY16	27.18	27.4367	11.3633	11.62	0.126667	0.915945	0.779682	0.16808	0.0970412
S-25	BvWRKY16	27.32		11.5033		0.266667	0.831238
S-25	BvWRKY16	27.81		11.9933		0.756667	0.591862
S-50	actin	18.18	18.2867	-0.106667	1.18424e-15	-0.106667	1.07674	1.00152	0.0681512	0.0393471
S-50	actin	18.37		0.0833333		0.0833333	0.943874
S-50	actin	18.31		0.0233333		0.0233333	0.983957
S-50	BvWRKY16	29.1	28.9733	10.8133	10.6867	-0.423333	1.34102	1.46697	0.111112	0.0641508
S-50	BvWRKY16	28.89		10.6033		-0.633333	1.55114
S-50	BvWRKY16	28.93		10.6433		-0.593333	1.50873
S-100	actin	17.02	17.0067	0.0133333	-1.18424e-15	0.0133333	0.990801	1.00163	0.0703199	0.0405992
S-100	actin	16.9		-0.106667		-0.106667	1.07674
S-100	actin	17.1		0.0933333		0.0933333	0.937354
S-100	BvWRKY16	28.67	28.7667	11.6633	11.76	0.426667	0.743979	0.697159	0.05356	0.0309229
S-100	BvWRKY16	28.89		11.8833		0.646667	0.638754
S-100	BvWRKY16	28.74		11.7333		0.496667	0.708742
R-0	actin	15.28	15.1733	0.106667	1.18424e-15	0.106667	0.928731	1.00137	0.063314	0.0365544
R-0	actin	15.13		-0.0433333		-0.0433333	1.03049
R-0	actin	15.11		-0.0633333		-0.0633333	1.04488
R-0	BvWRKY16	24.52	24.64	9.34667	9.46667	-0.12	1.08673	1.02067	0.241873	0.139646
R-0	BvWRKY16	25.05		9.87667		0.41	0.752623
R-0	BvWRKY16	24.35		9.17667		-0.29	1.22264
R-15	actin	15.01	15.0333	-0.0233333	5.92119e-16	-0.0233333	1.0163	1.02761	0.289456	0.167118
R-15	actin	15.46		0.426667		0.426667	0.743979
R-15	actin	14.63		-0.403333		-0.403333	1.32256
R-15	BvWRKY16	23.79	23.87	8.75667	8.83667	-0.71	1.6358	1.55659	0.200401	0.115701
R-15	BvWRKY16	23.73		8.69667		-0.77	1.70527
R-15	BvWRKY16	24.09		9.05667		-0.41	1.32869
R-25	actin	14	14.0767	-0.0766667	0	-0.0766667	1.05458	1.00072	0.0467681	0.0270016
R-25	actin	14.12		0.0433333		0.0433333	0.97041
R-25	actin	14.11		0.0333333		0.0333333	0.97716
R-25	BvWRKY16	21.04	20.9733	6.96333	6.89667	-2.50333	5.66994	5.94367	0.31713	0.183095
R-25	BvWRKY16	20.89		6.81333		-2.65333	6.29119
R-25	BvWRKY16	20.99		6.91333		-2.55333	5.86989
R-50	actin	14.66	15.6133	-0.953333	-1.18424e-15	-0.953333	1.93634	1.12962	0.706482	0.407887
R-50	actin	16.3		0.686667		0.686667	0.621288
R-50	actin	15.88		0.266667		0.266667	0.831238
R-50	BvWRKY16	21.28	21.32	5.66667	5.70667	-3.8	13.9288	13.554	0.4926	0.284403
R-50	BvWRKY16	21.38		5.76667		-3.7	12.996
R-50	BvWRKY16	21.3		5.68667		-3.78	13.737
R-100	actin	13.97	14.2367	-0.266667	5.92119e-16	-0.266667	1.20303	1.01001	0.176582	0.10195
R-100	actin	14.28		0.0433333		0.0433333	0.97041
R-100	actin	14.46		0.223333		0.223333	0.856584
R-100	BvWRKY16	21.14	20.9233	6.90333	6.68667	-2.56333	5.91072	6.91704	0.998785	0.576649
R-100	BvWRKY16	20.91		6.67333		-2.79333	6.9323
R-100	BvWRKY16	20.72		6.48333		-2.98333	7.90811
S: Shoot; R: Root

## Sheet: BvWRKY22
S_Name	Gene	Ct	Mean Ct	ΔCт	ΔCт Mean	ΔΔCт	2^-	Mean	SD	SE
S-0	actin	16.06	16.2033	-0.143333	0	-0.143333	1.10445	1.00773	0.148278	0.0856084
S-0	actin	16.09		-0.113333		-0.113333	1.08172
S-0	actin	16.46		0.256667		0.256667	0.83702
S-0	BvWRKY22	22.86	23.1833	6.65667	6.98	-0.323333	1.25122	1.01568	0.220517	0.127316
S-0	BvWRKY22	23.21		7.00667		0.0266667	0.981686
S-0	BvWRKY22	23.48		7.27667		0.296667	0.814131
S-15	actin	16.14	16.38	-0.24	1.18424e-15	-0.24	1.18099	1.00961	0.170064	0.0981863
S-15	actin	16.37		-0.01		-0.01	1.00696
S-15	actin	16.63		0.25		0.25	0.840896
S-15	BvWRKY22	22.9	23.4233	6.52	7.04333	-0.46	1.37554	0.995094	0.345097	0.199242
S-15	BvWRKY22	23.87		7.49		0.51	0.702222
S-15	BvWRKY22	23.5		7.12		0.14	0.907519
S-25	actin	15.64	15.7	-0.06	-5.92119e-16	-0.06	1.04247	1.00446	0.113713	0.0656522
S-25	actin	15.57		-0.13		-0.13	1.09429
S-25	actin	15.89		0.19		0.19	0.876606
S-25	BvWRKY22	23.18	23.24	7.48	7.54	0.5	0.707107	0.678864	0.0335946	0.0193958
S-25	BvWRKY22	23.22		7.52		0.54	0.687771
S-25	BvWRKY22	23.32		7.62		0.64	0.641713
S-50	actin	17.26	17.5233	-0.263333	0	-0.263333	1.20025	1.0086	0.165999	0.0958397
S-50	actin	17.66		0.136667		0.136667	0.909618
S-50	actin	17.65		0.126667		0.126667	0.915945
S-50	BvWRKY22	24	23.85	6.47667	6.32667	-0.503333	1.41748	1.57714	0.141218	0.0815321
S-50	BvWRKY22	23.75		6.22667		-0.753333	1.68568
S-50	BvWRKY22	23.8		6.27667		-0.703333	1.62826
S-100	actin	16.78	16.2433	0.536667	-1.77636e-15	0.536667	0.689362	1.03297	0.299002	0.172629
S-100	actin	16.01		-0.233333		-0.233333	1.17555
S-100	actin	15.94		-0.303333		-0.303333	1.23399
S-100	BvWRKY22	24.4	24.4033	8.15667	8.16	1.17667	0.442372	0.441354	0.0017642	0.00101856
S-100	BvWRKY22	24.41		8.16667		1.18667	0.439317
S-100	BvWRKY22	24.4		8.15667		1.17667	0.442372
R-0	actin	14.17	14.7833	-0.613333	0	-0.613333	1.52979	1.05912	0.437129	0.252377
R-0	actin	15.37		0.586667		0.586667	0.66588
R-0	actin	14.81		0.0266667		0.0266667	0.981686
R-0	BvWRKY22	21.74	21.85	6.95667	7.06667	-0.11	1.07923	1.00148	0.0674178	0.0389237
R-0	BvWRKY22	21.9		7.11667		0.05	0.965936
R-0	BvWRKY22	21.91		7.12667		0.06	0.959264
R-15	actin	14.8	14.7	0.1	-1.18424e-15	0.1	0.933033	1.00444	0.118105	0.0681877
R-15	actin	14.79		0.09		0.09	0.939523
R-15	actin	14.51		-0.19		-0.19	1.14076
R-15	BvWRKY22	21.57	21.6467	6.87	6.94667	-0.196667	1.14605	1.09016	0.103782	0.0599185
R-15	BvWRKY22	21.81		7.11		0.0433333	0.97041
R-15	BvWRKY22	21.56		6.86		-0.206667	1.15402
R-25	actin	13.68	13.74	-0.06	-5.92119e-16	-0.06	1.04247	1.00446	0.113713	0.0656522
R-25	actin	13.61		-0.13		-0.13	1.09429
R-25	actin	13.93		0.19		0.19	0.876606
R-25	BvWRKY22	20.69	20.8967	6.95	7.15667	-0.116667	1.08423	0.94452	0.121596	0.0702033
R-25	BvWRKY22	20.98		7.24		0.173333	0.886791
R-25	BvWRKY22	21.02		7.28		0.213333	0.862542
R-50	actin	14.06	14.18	-0.12	0	-0.12	1.08673	1.002	0.0780546	0.0450649
R-50	actin	14.2		0.02		0.02	0.986233
R-50	actin	14.28		0.1		0.1	0.933033
R-50	BvWRKY22	20.96	20.8633	6.78	6.68333	-0.286667	1.21982	1.30645	0.0909644	0.0525183
R-50	BvWRKY22	20.87		6.69		-0.376667	1.29834
R-50	BvWRKY22	20.76		6.58		-0.486667	1.4012
R-100	actin	14.75	14.8933	-0.143333	5.92119e-16	-0.143333	1.10445	1.01582	0.210428	0.121491
R-100	actin	14.67		-0.223333		-0.223333	1.16743
R-100	actin	15.26		0.366667		0.366667	0.775572
R-100	BvWRKY22	21.55	21.3533	6.65667	6.46	-0.41	1.32869	1.53076	0.189799	0.109581
R-100	BvWRKY22	21.32		6.42667		-0.64	1.55833
R-100	BvWRKY22	21.19		6.29667		-0.77	1.70527
S: Shoot; R: Root

## Sheet: BvWRKY41
S_Name	Gene	Ct	Mean Ct	ΔCт	ΔCт Mean	ΔΔCт	2^-	Mean	SD	SE
S-0	actin	16.56	16.63	-0.07	0	-0.07	1.04972	1.00924	0.163491	0.0943914
S-0	actin	16.43		-0.2		-0.2	1.1487
S-0	actin	16.9		0.27		0.27	0.82932
S-0	BvWRKY41	24.17	24.1067	7.54	7.47667	0.0633333	0.95705	1.00117	0.0598528	0.0345561
S-0	BvWRKY41	24.14		7.51		0.0333333	0.97716
S-0	BvWRKY41	24.01		7.38		-0.0966667	1.0693
S-15	actin	17.06	16.84	0.22	-1.18424e-15	0.22	0.858565	1.0074	0.149062	0.0860609
S-15	actin	16.63		-0.21		-0.21	1.15669
S-15	actin	16.83		-0.01		-0.01	1.00696
S-15	BvWRKY41	25.05	25.0933	8.21	8.25333	0.733333	0.601513	0.583849	0.0154267	0.00890663
S-15	BvWRKY41	25.12		8.28		0.803333	0.573024
S-15	BvWRKY41	25.11		8.27		0.793333	0.577009
S-25	actin	15.78	15.8167	-0.0366667	1.77636e-15	-0.0366667	1.02574	1.00191	0.0748282	0.0432021
S-25	actin	15.73		-0.0866667		-0.0866667	1.06191
S-25	actin	15.94		0.123333		0.123333	0.918064
S-25	BvWRKY41	24.44	24.4733	8.62333	8.65667	1.14667	0.451668	0.44211	0.0313765	0.0181152
S-25	BvWRKY41	24.39		8.57333		1.09667	0.467596
S-25	BvWRKY41	24.59		8.77333		1.29667	0.407066
S-50	actin	18.18	18.2867	-0.106667	1.18424e-15	-0.106667	1.07674	1.00152	0.0681512	0.0393471
S-50	actin	18.37		0.0833333		0.0833333	0.943874
S-50	actin	18.31		0.0233333		0.0233333	0.983957
S-50	BvWRKY41	24.35	24.35	6.06333	6.06333	-1.41333	2.66352	2.66625	0.147791	0.0853274
S-50	BvWRKY41	24.43		6.14333		-1.33333	2.51984
S-50	BvWRKY41	24.27		5.98333		-1.49333	2.81539
S-100	actin	17.02	17.0067	0.0133333	-1.18424e-15	0.0133333	0.990801	1.00163	0.0703199	0.0405992
S-100	actin	16.9		-0.106667		-0.106667	1.07674
S-100	actin	17.1		0.0933333		0.0933333	0.937354
S-100	BvWRKY41	24.6	24.7333	7.59333	7.72667	0.116667	0.922316	0.843042	0.0740806	0.0427705
S-100	BvWRKY41	24.85		7.84333		0.366667	0.775572
S-100	BvWRKY41	24.75		7.74333		0.266667	0.831238
R-0	actin	15.28	15.1733	0.106667	1.18424e-15	0.106667	0.928731	1.00137	0.063314	0.0365544
R-0	actin	15.13		-0.0433333		-0.0433333	1.03049
R-0	actin	15.11		-0.0633333		-0.0633333	1.04488
R-0	BvWRKY41	23.37	23.4667	8.19667	8.29333	-0.0966667	1.0693	1.0016	0.0692598	0.0399872
R-0	BvWRKY41	23.46		8.28667		-0.00666667	1.00463
R-0	BvWRKY41	23.57		8.39667		0.103333	0.93088
R-15	actin	15.01	15.0333	-0.0233333	5.92119e-16	-0.0233333	1.0163	1.02761	0.289456	0.167118
R-15	actin	15.46		0.426667		0.426667	0.743979
R-15	actin	14.63		-0.403333		-0.403333	1.32256
R-15	BvWRKY41	23.16	22.93	8.12667	7.89667	-0.166667	1.12246	1.32942	0.229622	0.132572
R-15	BvWRKY41	22.96		7.92667		-0.366667	1.28937
R-15	BvWRKY41	22.67		7.63667		-0.656667	1.57644
R-25	actin	14	14.0767	-0.0766667	0	-0.0766667	1.05458	1.00072	0.0467681	0.0270016
R-25	actin	14.12		0.0433333		0.0433333	0.97041
R-25	actin	14.11		0.0333333		0.0333333	0.97716
R-25	BvWRKY41	22.2	22.2867	8.12333	8.21	-0.17	1.12506	1.06045	0.0564087	0.0325676
R-25	BvWRKY41	22.32		8.24333		-0.05	1.03526
R-25	BvWRKY41	22.34		8.26333		-0.03	1.02101
R-50	actin	14.66	15.6133	-0.953333	-1.18424e-15	-0.953333	1.93634	1.12962	0.706482	0.407887
R-50	actin	16.3		0.686667		0.686667	0.621288
R-50	actin	15.88		0.266667		0.266667	0.831238
R-50	BvWRKY41	22.19	22.1667	6.57667	6.55333	-1.71667	3.28676	3.34069	0.0583713	0.0337007
R-50	BvWRKY41	22.14		6.52667		-1.76667	3.40267
R-50	BvWRKY41	22.17		6.55667		-1.73667	3.33264
R-100	actin	13.97	14.2367	-0.266667	5.92119e-16	-0.266667	1.20303	1.01001	0.176582	0.10195
R-100	actin	14.28		0.0433333		0.0433333	0.97041
R-100	actin	14.46		0.223333		0.223333	0.856584
R-100	BvWRKY41	23.35	23.3067	9.11333	9.07	0.82	0.566442	0.583847	0.0152127	0.00878306
R-100	BvWRKY41	23.28		9.04333		0.75	0.594604
R-100	BvWRKY41	23.29		9.05333		0.76	0.590496
S: Shoot; R: Root

## Sheet: BvWRKY42
S_Name	Gene	Ct	Mean Ct	ΔCт	ΔCт Mean	ΔΔCт	2^-	Mean	SD	SE
S-0	actin	16.29	16.3933	-0.103333	-1.18424e-15	-0.103333	1.07425	1.00269	0.088785	0.05126
S-0	actin	16.35		-0.0433333		-0.0433333	1.03049
S-0	actin	16.54		0.146667		0.146667	0.903335
S-0	BvWRKY42	26.77	26.87	10.3767	10.4767	-0.1	1.07177	1.00518	0.121857	0.0703541
S-0	BvWRKY42	26.76		10.3667		-0.11	1.07923
S-0	BvWRKY42	27.08		10.6867		0.21	0.864537
S-15	actin	16.57	16.67	-0.1	1.18424e-15	-0.1	1.07177	1.00309	0.0947256	0.0546899
S-15	actin	16.83		0.16		0.16	0.895025
S-15	actin	16.61		-0.06		-0.06	1.04247
S-15	BvWRKY42	26.55	26.8567	9.88	10.1867	-0.596667	1.51222	1.24043	0.25849	0.149239
S-15	BvWRKY42	26.87		10.2		-0.276667	1.21139
S-15	BvWRKY42	27.15		10.48		0.00333333	0.997692
S-25	actin	15.74	15.76	-0.02	5.92119e-16	-0.02	1.01396	1.00274	0.0901333	0.0520385
S-25	actin	15.9		0.14		0.14	0.907519
S-25	actin	15.64		-0.12		-0.12	1.08673
S-25	BvWRKY42	25.54	25.5967	9.78	9.83667	-0.696667	1.62076	1.55923	0.0649088	0.0374751
S-25	BvWRKY42	25.59		9.83		-0.646667	1.56555
S-25	BvWRKY42	25.66		9.9		-0.576667	1.4914
S-50	actin	17.74	17.6533	0.0866667	0	0.0866667	0.941696	1.00131	0.0627775	0.0362446
S-50	actin	17.66		0.00666667		0.00666667	0.99539
S-50	actin	17.56		-0.0933333		-0.0933333	1.06683
S-50	BvWRKY42	27.3	27.3833	9.64667	9.73	-0.83	1.77769	1.68079	0.119286	0.0688698
S-50	BvWRKY42	27.5		9.84667		-0.63	1.54756
S-50	BvWRKY42	27.35		9.69667		-0.78	1.71713
S-100	actin	16.18	16.4633	-0.283333	-1.18424e-15	-0.283333	1.217	1.02837	0.278302	0.160678
S-100	actin	16.25		-0.213333		-0.213333	1.15936
S-100	actin	16.96		0.496667		0.496667	0.708742
S-100	BvWRKY42	26.42	26.4	9.95667	9.93667	-0.52	1.43396	1.46083	0.174479	0.100735
S-100	BvWRKY42	26.22		9.75667		-0.72	1.64718
S-100	BvWRKY42	26.56		10.0967		-0.38	1.30134
R-0	actin	14.55	14.63	-0.08	-5.92119e-16	-0.08	1.05702	1.00702	0.142033	0.0820027
R-0	actin	14.87		0.24		0.24	0.846745
R-0	actin	14.47		-0.16		-0.16	1.11729
R-0	BvWRKY42	20.72	20.9967	6.09	6.36667	-0.276667	1.21139	1.01625	0.216865	0.125207
R-0	BvWRKY42	21.35		6.72		0.353333	0.782773
R-0	BvWRKY42	20.92		6.29		-0.0766667	1.05458
R-15	actin	13.94	14.38	-0.44	-1.18424e-15	-0.44	1.3566	1.02458	0.287543	0.166013
R-15	actin	14.6		0.22		0.22	0.858565
R-15	actin	14.6		0.22		0.22	0.858565
R-15	BvWRKY42	20.5	20.2367	6.12	5.85667	-0.246667	1.18646	1.43558	0.21581	0.124598
R-15	BvWRKY42	20.11		5.73		-0.636667	1.55473
R-15	BvWRKY42	20.1		5.72		-0.646667	1.56555
R-25	actin	13.19	13.4467	-0.256667	-5.92119e-16	-0.256667	1.19472	1.01627	0.215144	0.124213
R-25	actin	13.34		-0.106667		-0.106667	1.07674
R-25	actin	13.81		0.363333		0.363333	0.777366
R-25	BvWRKY42	19.2	19.2433	5.75333	5.79667	-0.613333	1.52979	1.48515	0.0524753	0.0302966
R-25	BvWRKY42	19.23		5.78333		-0.583333	1.49831
R-25	BvWRKY42	19.3		5.85333		-0.513333	1.42734
R-50	actin	14.06	13.94	0.12	1.18424e-15	0.12	0.920188	1.00654	0.144054	0.0831696
R-50	actin	14.05		0.11		0.11	0.926588
R-50	actin	13.71		-0.23		-0.23	1.17283
R-50	BvWRKY42	19.08	19.0533	5.14	5.11333	-1.22667	2.34026	2.38416	0.0415164	0.0239695
R-50	BvWRKY42	19.03		5.09		-1.27667	2.42279
R-50	BvWRKY42	19.05		5.11		-1.25667	2.38943
R-100	actin	13.64	13.4233	0.216667	1.18424e-15	0.216667	0.860551	1.01426	0.214976	0.124116
R-100	actin	13.54		0.116667		0.116667	0.922316
R-100	actin	13.09		-0.333333		-0.333333	1.25992
R-100	BvWRKY42	19.08	19.0767	5.65667	5.65333	-0.71	1.6358	1.63975	0.0286511	0.0165417
R-100	BvWRKY42	19.05		5.62667		-0.74	1.67018
R-100	BvWRKY42	19.1		5.67667		-0.69	1.61328
S: Shoot; R: Root

## Sheet: BvWRKY44
S_Name	Gene	Ct	Mean Ct	ΔCт	ΔCт Mean	ΔΔCт	2^-	Mean	SD	SE
S-0	actin	16.12	16.19	-0.07	-1.18424e-15	-0.07	1.04972	1.0006	0.0426729	0.0246372
S-0	actin	16.22		0.03		0.03	0.97942
S-0	actin	16.23		0.04		0.04	0.972655
S-0	BvWRKY44	20.64	20.74	4.45	4.55	-0.1	1.07177	1.00135	0.0642076	0.0370703
S-0	BvWRKY44	20.82		4.63		0.08	0.946058
S-0	BvWRKY44	20.76		4.57		0.02	0.986233
S-15	actin	16.63	16.6433	-0.0133333	-1.18424e-15	-0.0133333	1.00928	1.00016	0.0221556	0.0127916
S-15	actin	16.68		0.0366667		0.0366667	0.974905
S-15	actin	16.62		-0.0233333		-0.0233333	1.0163
S-15	BvWRKY44	21.28	21.38	4.63667	4.73667	0.0866667	0.941696	0.879919	0.058448	0.033745
S-15	BvWRKY44	21.47		4.82667		0.276667	0.825496
S-15	BvWRKY44	21.39		4.74667		0.196667	0.872564
S-25	actin	15.48	15.61	-0.13	5.92119e-16	-0.13	1.09429	1.00207	0.0799408	0.0461539
S-25	actin	15.67		0.06		0.06	0.959264
S-25	actin	15.68		0.07		0.07	0.952638
S-25	BvWRKY44	19.78	19.97	4.17	4.36	-0.38	1.30134	1.14679	0.144918	0.0836685
S-25	BvWRKY44	20.14		4.53		-0.02	1.01396
S-25	BvWRKY44	19.99		4.38		-0.17	1.12506
S-50	actin	17.32	17.36	-0.04	-2.36848e-15	-0.04	1.02811	1.0012	0.0594725	0.0343365
S-50	actin	17.3		-0.06		-0.06	1.04247
S-50	actin	17.46		0.1		0.1	0.933033
S-50	BvWRKY44	21.9	21.9033	4.54	4.54333	-0.01	1.00696	1.00512	0.0382977	0.0221112
S-50	BvWRKY44	21.85		4.49		-0.06	1.04247
S-50	BvWRKY44	21.96		4.6		0.05	0.965936
S-100	actin	16.16	16.19	-0.03	-1.18424e-15	-0.03	1.02101	1.00021	0.0248748	0.0143615
S-100	actin	16.23		0.04		0.04	0.972655
S-100	actin	16.18		-0.01		-0.01	1.00696
S-100	BvWRKY44	19.65	19.8933	3.46	3.70333	-1.09	2.12874	1.81184	0.27736	0.160134
S-100	BvWRKY44	20.05		3.86		-0.69	1.61328
S-100	BvWRKY44	19.98		3.79		-0.76	1.69349
R-0	actin	14.85	14.9133	-0.0633333	-5.92119e-16	-0.0633333	1.04488	1.00115	0.0581228	0.0335572
R-0	actin	15.01		0.0966667		0.0966667	0.935191
R-0	actin	14.88		-0.0333333		-0.0333333	1.02337
R-0	BvWRKY44	20.52	20.63	5.60667	5.71667	-0.11	1.07923	1.01885	0.231515	0.133665
R-0	BvWRKY44	20.35		5.43667		-0.28	1.21419
R-0	BvWRKY44	21.02		6.10667		0.39	0.76313
R-15	actin	14.44	14.66	-0.22	-1.77636e-15	-0.22	1.16473	1.03626	0.314092	0.181341
R-15	actin	15.22		0.56		0.56	0.678302
R-15	actin	14.32		-0.34		-0.34	1.26576
R-15	BvWRKY44	19.17	19.15	4.51	4.49	-1.20667	2.30804	2.34097	0.0712991	0.0411645
R-15	BvWRKY44	19.1		4.44		-1.27667	2.42279
R-15	BvWRKY44	19.18		4.52		-1.19667	2.29209
R-25	actin	14.1	13.8433	0.256667	-5.92119e-16	0.256667	0.83702	1.0078	0.149111	0.086089
R-25	actin	13.74		-0.103333		-0.103333	1.07425
R-25	actin	13.69		-0.153333		-0.153333	1.11214
R-25	BvWRKY44	20.12	19.9033	6.27667	6.06	0.56	0.678302	0.794358	0.121239	0.0699971
R-25	BvWRKY44	19.68		5.83667		0.12	0.920188
R-25	BvWRKY44	19.91		6.06667		0.35	0.784584
R-50	actin	14.14	14.0833	0.0566667	-5.92119e-16	0.0566667	0.961483	1.00071	0.0465459	0.0268733
R-50	actin	14.1		0.0166667		0.0166667	0.988514
R-50	actin	14.01		-0.0733333		-0.0733333	1.05214
R-50	BvWRKY44	19.76	20.03	5.67667	5.94667	-0.04	1.02811	0.860602	0.147078	0.0849153
R-50	BvWRKY44	20.12		6.03667		0.32	0.80107
R-50	BvWRKY44	20.21		6.12667		0.41	0.752623
R-100	actin	14.41	14.37	0.04	1.18424e-15	0.04	0.972655	1.0006	0.0426729	0.0246372
R-100	actin	14.4		0.03		0.03	0.97942
R-100	actin	14.3		-0.07		-0.07	1.04972
R-100	BvWRKY44	18.67	18.8833	4.3	4.51333	-1.41667	2.66968	2.31905	0.337955	0.195118
R-100	BvWRKY44	19.09		4.72		-0.996667	1.99538
R-100	BvWRKY44	18.89		4.52		-1.19667	2.29209
S: Shoot; R: Root

## Sheet: BvWRKY47
S_Name	Gene	Ct	Mean Ct	ΔCт	ΔCт Mean	ΔΔCт	2^-	Mean	SD	SE
S-0	actin	16.08	16.1133	-0.0333333	-1.18424e-15	-0.0333333	1.02337	1.0002	0.0243037	0.0140317
S-0	actin	16.11		-0.00333333		-0.00333333	1.00231
S-0	actin	16.15		0.0366667		0.0366667	0.974905
S-0	BvWRKY47	27.36	27.3967	11.2467	11.2833	-0.0366667	1.02574	1.00349	0.101255	0.0584596
S-0	BvWRKY47	27.56		11.4467		0.163333	0.89296
S-0	BvWRKY47	27.27		11.1567		-0.126667	1.09177
S-15	actin	15.79	15.9833	-0.193333	-1.18424e-15	-0.193333	1.1434	1.00497	0.124192	0.0717024
S-15	actin	16.03		0.0466667		0.0466667	0.968171
S-15	actin	16.13		0.146667		0.146667	0.903335
S-15	BvWRKY47	26.92	27.09	10.9367	11.1067	-0.346667	1.27162	1.13438	0.120279	0.0694429
S-15	BvWRKY47	27.2		11.2167		-0.0666667	1.04729
S-15	BvWRKY47	27.15		11.1667		-0.116667	1.08423
S-25	actin	16.42	16.3133	0.106667	1.18424e-15	0.106667	0.928731	1.00241	0.0859425	0.0496189
S-25	actin	16.18		-0.133333		-0.133333	1.09682
S-25	actin	16.34		0.0266667		0.0266667	0.981686
S-25	BvWRKY47	27.21	27.17	10.8967	10.8567	-0.386667	1.30737	1.34517	0.0654683	0.0377982
S-25	BvWRKY47	27.09		10.7767		-0.506667	1.42076
S-25	BvWRKY47	27.21		10.8967		-0.386667	1.30737
S-50	actin	17.18	17.2233	-0.0433333	1.18424e-15	-0.0433333	1.03049	1.00753	0.148685	0.0858432
S-50	actin	17.03		-0.193333		-0.193333	1.1434
S-50	actin	17.46		0.236667		0.236667	0.848704
S-50	BvWRKY47	27.6	27.8	10.3767	10.5767	-0.906667	1.87471	1.64357	0.236953	0.136805
S-50	BvWRKY47	27.78		10.5567		-0.726667	1.65481
S-50	BvWRKY47	28.02		10.7967		-0.486667	1.4012
S-100	actin	16.11	16.2733	-0.163333	3.55271e-15	-0.163333	1.11987	1.00903	0.160086	0.0924257
S-100	actin	16.16		-0.113333		-0.113333	1.08172
S-100	actin	16.55		0.276667		0.276667	0.825496
S-100	BvWRKY47	28.29	28.2967	12.0167	12.0233	0.733333	0.601513	0.598781	0.00861268	0.00497253
S-100	BvWRKY47	28.28		12.0067		0.723333	0.605696
S-100	BvWRKY47	28.32		12.0467		0.763333	0.589134
R-0	actin	14.09	14.1267	-0.0366667	0	-0.0366667	1.02574	1.00159	0.0683436	0.0394582
R-0	actin	14.05		-0.0766667		-0.0766667	1.05458
R-0	actin	14.24		0.113333		0.113333	0.92445
R-0	BvWRKY47	19.13	19.0433	5.00333	4.91667	0.0866667	0.941696	1.00149	0.0672239	0.0388117
R-0	BvWRKY47	19.06		4.93333		0.0166667	0.988514
R-0	BvWRKY47	18.94		4.81333		-0.103333	1.07425
R-15	actin	14.51	14.7533	-0.243333	1.18424e-15	-0.243333	1.18372	1.00742	0.153515	0.0886321
R-15	actin	14.9		0.146667		0.146667	0.903335
R-15	actin	14.85		0.0966667		0.0966667	0.935191
R-15	BvWRKY47	19.19	19.2233	4.43667	4.47	-0.48	1.39474	1.36316	0.0331232	0.0191237
R-15	BvWRKY47	19.26		4.50667		-0.41	1.32869
R-15	BvWRKY47	19.22		4.46667		-0.45	1.36604
R-25	actin	14.95	14.5167	0.433333	5.92119e-16	0.433333	0.740549	1.16673	0.830525	0.479504
R-25	actin	15.17		0.653333		0.653333	0.63581
R-25	actin	13.43		-1.08667		-1.08667	2.12383
R-25	BvWRKY47	18.01	18.1133	3.49333	3.59667	-1.42333	2.68204	2.50068	0.174115	0.100525
R-25	BvWRKY47	18.21		3.69333		-1.22333	2.33486
R-25	BvWRKY47	18.12		3.60333		-1.31333	2.48515
R-50	actin	14.24	14.1733	0.0666667	0	0.0666667	0.954842	1.03106	0.316515	0.18274
R-50	actin	14.57		0.396667		0.396667	0.759611
R-50	actin	13.71		-0.463333		-0.463333	1.37872
R-50	BvWRKY47	19.21	19.32	5.03667	5.14667	0.12	0.920188	0.855077	0.0781322	0.0451096
R-50	BvWRKY47	19.28		5.10667		0.19	0.876606
R-50	BvWRKY47	19.47		5.29667		0.38	0.768438
R-100	actin	13.92	14.0533	-0.133333	-1.18424e-15	-0.133333	1.09682	1.00218	0.0822277	0.0474742
R-100	actin	14.11		0.0566667		0.0566667	0.961483
R-100	actin	14.13		0.0766667		0.0766667	0.948246
R-100	BvWRKY47	18.45	18.5733	4.39667	4.52	-0.52	1.43396	1.32158	0.14001	0.0808349
R-100	BvWRKY47	18.52		4.46667		-0.45	1.36604
R-100	BvWRKY47	18.75		4.69667		-0.22	1.16473
S: Shoot; R: Root

## Sheet: BvWRKY51
S_Name	Gene	Ct	Mean Ct	ΔCт	ΔCт Mean	ΔΔCт	2^-	Mean	SD	SE
S-0	actin	16.29	16.3933	-0.103333	-1.18424e-15	-0.103333	1.07425	1.00269	0.088785	0.05126
S-0	actin	16.35		-0.0433333		-0.0433333	1.03049
S-0	actin	16.54		0.146667		0.146667	0.903335
S-0	BvWRKY51	23.25	23.3533	6.85667	6.96	-0.103333	1.07425	1.00195	0.0762332	0.0440133
S-0	BvWRKY51	23.34		6.94667		-0.0133333	1.00928
S-0	BvWRKY51	23.47		7.07667		0.116667	0.922316
S-15	actin	16.57	16.67	-0.1	1.18424e-15	-0.1	1.07177	1.00309	0.0947256	0.0546899
S-15	actin	16.83		0.16		0.16	0.895025
S-15	actin	16.61		-0.06		-0.06	1.04247
S-15	BvWRKY51	24.16	24.12	7.49	7.45	0.53	0.692555	0.712208	0.0197447	0.0113996
S-15	BvWRKY51	24.12		7.45		0.49	0.712025
S-15	BvWRKY51	24.08		7.41		0.45	0.732043
S-25	actin	15.74	15.76	-0.02	5.92119e-16	-0.02	1.01396	1.00274	0.0901333	0.0520385
S-25	actin	15.9		0.14		0.14	0.907519
S-25	actin	15.64		-0.12		-0.12	1.08673
S-25	BvWRKY51	23.16	23.2467	7.4	7.48667	0.44	0.737135	0.694886	0.039178	0.0226194
S-25	BvWRKY51	23.26		7.5		0.54	0.687771
S-25	BvWRKY51	23.32		7.56		0.6	0.659754
S-50	actin	17.74	17.6533	0.0866667	0	0.0866667	0.941696	1.00131	0.0627775	0.0362446
S-50	actin	17.66		0.00666667		0.00666667	0.99539
S-50	actin	17.56		-0.0933333		-0.0933333	1.06683
S-50	BvWRKY51	24.78	24.91	7.12667	7.25667	0.166667	0.890899	0.815887	0.0663469	0.0383054
S-50	BvWRKY51	24.95		7.29667		0.336667	0.791869
S-50	BvWRKY51	25		7.34667		0.386667	0.764895
S-100	actin	16.18	16.4633	-0.283333	-1.18424e-15	-0.283333	1.217	1.02837	0.278302	0.160678
S-100	actin	16.25		-0.213333		-0.213333	1.15936
S-100	actin	16.96		0.496667		0.496667	0.708742
S-100	BvWRKY51	23.89	23.95	7.42667	7.48667	0.466667	0.723635	0.694633	0.0314042	0.0181312
S-100	BvWRKY51	23.94		7.47667		0.516667	0.698985
S-100	BvWRKY51	24.02		7.55667		0.596667	0.66128
R-0	actin	14.55	14.63	-0.08	-5.92119e-16	-0.08	1.05702	1.00702	0.142033	0.0820027
R-0	actin	14.87		0.24		0.24	0.846745
R-0	actin	14.47		-0.16		-0.16	1.11729
R-0	BvWRKY51	21.36	21.3867	6.73	6.75667	-0.0266667	1.01866	1.00066	0.044067	0.0254421
R-0	BvWRKY51	21.46		6.83		0.0733333	0.950439
R-0	BvWRKY51	21.34		6.71		-0.0466667	1.03288
R-15	actin	13.94	14.38	-0.44	-1.18424e-15	-0.44	1.3566	1.02458	0.287543	0.166013
R-15	actin	14.6		0.22		0.22	0.858565
R-15	actin	14.6		0.22		0.22	0.858565
R-15	BvWRKY51	20.54	20.6167	6.16	6.23667	-0.596667	1.51222	1.43503	0.0684082	0.0394955
R-15	BvWRKY51	20.64		6.26		-0.496667	1.41095
R-15	BvWRKY51	20.67		6.29		-0.466667	1.38191
R-25	actin	13.19	13.4467	-0.256667	-5.92119e-16	-0.256667	1.19472	1.01627	0.215144	0.124213
R-25	actin	13.34		-0.106667		-0.106667	1.07674
R-25	actin	13.81		0.363333		0.363333	0.777366
R-25	BvWRKY51	20.2	20.2	6.75333	6.75333	-0.00333333	1.00231	1.00246	0.0208444	0.0120345
R-25	BvWRKY51	20.23		6.78333		0.0266667	0.981686
R-25	BvWRKY51	20.17		6.72333		-0.0333333	1.02337
R-50	actin	14.06	13.94	0.12	1.18424e-15	0.12	0.920188	1.00654	0.144054	0.0831696
R-50	actin	14.05		0.11		0.11	0.926588
R-50	actin	13.71		-0.23		-0.23	1.17283
R-50	BvWRKY51	20.18	20.18	6.24	6.24	-0.516667	1.43065	1.43122	0.0495948	0.0286336
R-50	BvWRKY51	20.13		6.19		-0.566667	1.4811
R-50	BvWRKY51	20.23		6.29		-0.466667	1.38191
R-100	actin	13.64	13.4233	0.216667	1.18424e-15	0.216667	0.860551	1.01426	0.214976	0.124116
R-100	actin	13.54		0.116667		0.116667	0.922316
R-100	actin	13.09		-0.333333		-0.333333	1.25992
R-100	BvWRKY51	20.2	20.25	6.77667	6.82667	0.02	0.986233	0.952959	0.0304154	0.0175603
R-100	BvWRKY51	20.29		6.86667		0.11	0.926588
R-100	BvWRKY51	20.26		6.83667		0.08	0.946058
S: Shoot; R: Root

## Sheet: Figure
Relative expression level of BvWRKY genes												Figure
(a) BvWRKY3		NaHCO3 (mM)	0	15	25	50	100		Shoot（SE）	Root（SE）
		Shoot	1.03293	1.98465	1.92276	1.82799	0.792533		0.175829	0.100603
		Root	1.00951	0.965554	1.01473	0.901439	1.77944		0.205011	0.0416211
									0.127228	0.0277339
									0.261951	0.0130681
									0.023082	0.160802
(b) BvWRKY10		NaHCO3 (mM)	0	15	25	50	100		Shoot（SE）	Root（SE）
		Shoot	1.06003	1.73003	2.29868	3.24443	2.92949		0.267231	0.0379582
		Root	1.00147	1.50912	1.32277	0.692889	0.728905		0.276299	0.0244874
									0.306739	0.0648133
									0.0972496	0.0151061
									0.0625746	0.0131292
(c) BvWRKY16		NaHCO3 (mM)	0	15	25	50	100		Shoot（SE）	Root（SE）
		Shoot	1.0298	1.06969	0.779682	1.46697	0.697159		0.177661	0.139646
		Root	1.02067	1.55659	5.94367	13.554	6.91704		0.154265	0.115701
									0.0970412	0.183095
									0.0641508	0.284403
									0.0309229	0.576649
(d) BvWRKY22		NaHCO3 (mM)	0	15	25	50	100		Shoot（SE）	Root（SE）
		Shoot	1.01568	0.995094	0.678864	1.57714	0.441354		0.127316	0.0389237
		Root	1.00148	1.09016	0.94452	1.30645	1.53076		0.199242	0.0599185
									0.0193958	0.0702033
									0.0815321	0.0525183
									0.00101856	0.109581
(e) BvWRKY41		NaHCO3 (mM)	0	15	25	50	100		Shoot（SE）	Root（SE）
		Shoot	1.00117	0.583849	0.44211	2.66625	0.843042		0.0345561	0.0399872
		Root	1.0016	1.32942	1.06045	3.34069	0.583847		0.00890663	0.132572
									0.0181152	0.0325676
									0.0853274	0.0337007
									0.0427705	0.00878306
(f) BvWRKY42	NaHCO3 (mM)		0	15	25	50	100		Shoot（SE）	Root（SE）
		Shoot	1.00518	1.24043	1.33711	1.68079	1.46083		0.0703541	0.125207
		Root	1.01625	1.43558	1.55923	2.38416	1.63975		0.149239	0.124598
									0.0374751	0.0302966
									0.0688698	0.0239695
									0.100735	0.0165417
(g) BvWRKY44	NaHCO3 (mM)		0	15	25	50	100		Shoot（SE）	Root（SE）
		Shoot	1.00135	0.879919	1.14679	1.00512	1.81184		0.0370703	0.133665
		Root	1.01885	2.34097	0.794358	0.860602	2.31905		0.033745	0.0411645
									0.0836685	0.0699971
									0.0221112	0.0849153
									0.160134	0.195118
(h) BvWRKY47	NaHCO3 (mM)		0	15	25	50	100		Shoot（SE）	Root（SE）
		Shoot	1.00349	1.13438	1.34517	1.64357	0.598781		0.0584596	0.0388117
		Root	1.00149	1.36316	2.50068	0.855077	1.32158		0.0694429	0.0191237
									0.0377982	0.100525
									0.136805	0.0451096
									0.00497253	0.0808349
(i) BvWRKY51	NaHCO3 (mM)		0	15	25	50	100		Shoot（SE）	Root（SE）
		Shoot	1.00195	0.712208	0.694886	0.815887	0.694633		0.0440133	0.0254421
		Root	1.00066	1.43503	1.00246	1.43122	0.952959		0.0113996	0.0394955
									0.0226194	0.0120345
									0.0383054	0.0286336
									0.0181312	0.0175603
