# Supplementary material for: Genome-wide identification and expression analysis of the WRKY genes in sugar beet (Beta vulgaris L.) under alkaline stress
Source: PeerJ. 2019 Oct 14;7:e7817. doi: 10.7717/peerj.7817 (PMC6796966; doi:10.7717/peerj.7817)
Supplement: Table S5 [file peerj-07-7817-s010.xlsx]

## Sheet: Fresh and Dry weight
Table S4 Phenotypic data in sugar beet after 7 days of alkali stress treatment
NaHCO3 (mM)	SFW (mg/plant)	Average	SD	SE	RFW (mg/plant)	Average	SD	SE	SDW (mg/plant)	Average	SD	SE	RDW (mg/plant)	Average	SD	SE
0	301.15	251.409	38.4522	13.5949	84.25	69.0928	11.4613	4.05219	20.75	15.8438	3.61578	1.27837	5.85	5.23125	1.27921	0.45227
	221				60.5				14.45				3.65
	195.7				62.5				14.1				4.55
	237.085				69.0925				10.7				4.9
	244.85				66.65				14.25				5.3
	266.8				86.75				13.65				3.9
	237.086				53.15				18.2				6.15
	307.6				69.85				20.65				7.55
15	300.405	300.407	77.3936	27.3628	75.37	75.3713	18.5838	6.57036	12.85	18.1375	5.37552	1.90053	4	5.21875	1.62171	0.573362
	247.35				57.65				12.35				4.2
	448.2				107.65				14.85				3.95
	213.4				64.75				23.9				7.55
	358.9				98.15				26.25				7.6
	311.45				63.7				13.95				4.25
	221.95				58.35				21.6				6.15
	301.6				77.35				19.35				4.05
25	283.335	277.606	36.4133	12.874	77.8775	77.2384	6.37911	2.25536	18.15	18.575	2.90799	1.02813	4.55	5.5375	0.886707	0.313498
	294.55				80.6				19.1				5.2
	325.4				77.9				21.2				7
	226.35				67.6				16.45				5.4
	220.95				70.4				14.15				4.9
	283.36				77.8795				23.1				6.65
	305.8				88.75				16.35				4.8
	281.1				76.9				20.1				5.8
50	272.35	275.269	29.3209	10.3665	73.85	68.983	7.10364	2.51151	17.15	17.9	3.7106	1.3119	4.9	4.79375	1.05473	0.372903
	208.55				53.95				11.5				3.15
	289.7				68.95				22.65				5.55
	300				63.2				17.5				4.65
	287.5				73.155				18.05				4.35
	263.75				71.05				22.9				6.55
	287.6				73.159				18.2				5.35
	292.7				74.55				15.25				3.85
100	287.5	247.502	29.959	10.5921	75	58.9026	7.69856	2.72185	12.55	14.9812	4.15098	1.46759	3.1	4.7375	1.37964	0.487775
	241				51.95				17.2				5.15
	240.105				57.385				17.3				4.2
	208.85				52.05				19.8				5.65
	226.15				54.2				13.35				4.1
	240.109				57.386				12.9				3.6
	297.55				64.7				7.5				7.5
	238.75				58.55				19.25				4.6
Note: SFW: shoot fresh weight; RFW: root fresh weight; SDW: shoot dry weight; RDW: root dry weight.

## Sheet: Figure
						Figure
(a) Fresh weight (mg/plant)
NaCHO3 (mM)	Shoot	Root	Shoot (SE)	Root (SE)
0	251.409	69.0929	13.5949	4.05219
15	300.407	75.3714	27.3628	6.57036
25	277.606	77.8786	12.874	2.25536
50	275.269	73.1571	10.3665	2.51151
100	247.502	57.3857	10.5921	2.72185
(b) Dry weight (mg/plant)
NaCHO3 (mM)	Shoot	Root	Shoot (SE)	Root (SE)
0	15.84	5.23125	1.27837	0.45227
15	18.14	5.21875	1.90053	0.573362
25	18.58	5.5375	1.02813	0.313498
50	17.9	4.79375	1.3119	0.372903
100	14.98	4.79375	1.46759	0.487775
